# Supplementary material for: Atmospheric CO 2 estimates for the Miocene to Pleistocene based on foraminiferal δ 11 B at Ocean Drilling Program Sites 806 and 807 in the Western Equatorial Pacific
Source: Copernicus journal article supplement (doi:10.5194/cp-2020-158), 2021-02-08
Supplement: Supplementary file 1 [file cp-2020-158-supplement-version4.zip]

## Sheet: Supplemental B
Supplement B: Analytical data and reconstructed parameters for ODP Sites 806 and 807.
Species	Sample	mcd	mbsf	Shell Wt	Age		δ11B (1)	2SDAE121	δ11B (2)	2SDAE121	δ11B (average)	error		Mg/Ca	B/Ca	Li/Ca	Sr/Ca		SST	error	Salinity	TA	pH	error(1) up	error(1) down	error(2) up	error(2) down	pCO2	error(1) up	error(1) down	error(2) up	error(2) down
				(µg)	(Ma)		(‰)	(‰)	(‰)	(‰)	(‰)	(‰)		(mmol/mol)	(µmol/mol)	(µmol/mol)	(mmol/mol)		(°C)	(°C)	(psu)	(µmol/kg)						(ppm)	(ppm)	(ppm)	(ppm)	(ppm)
G. ruber	806B 3 2 101-103	18.51	18.51	16.8416	0.90395		19.033	0.289797			19.033	0.289797		3.52589	103.199	14.1606	1.45717		27.7729	1.76931	35.3576	2246.07	8.19959	0.0825508	0.0751479	0.0304685	0.0223806	229.75	63.4378	49.8356	19.7448	18.7512
G. ruber	806B 3 4 86-88	21.36	21.36	15.9189	1.01859		20.1818	0.289797			20.1818	0.289797		4.62928	97.3259	13.7632	1.4176		33.1756	1.62424	35.3304	2242.79	8.2781	0.0733662	0.0685498	0.0275653	0.0204054	173.664	45.4302	36.9439	14.7562	14.1479
G. ruber	806B 3 5 6-8	22.06	22.06	16.0737	1.0457		18.6323	0.289797			18.6323	0.289797		3.26938	105.557	14.6285	1.43754		26.2117	1.84436	35.298	2241.22	8.16307	0.0875814	0.0788068	0.0320274	0.0234916	257.641	73.9317	57.0073	22.5494	21.3
G. ruber	806B 3 5 26-28	22.26	22.26	15.6418	1.0537		19.1447	0.289797			19.1447	0.289797		3.32287	116.255	14.0628	1.44293		27.3124	1.76037	35.1551	2240.76	8.21907	0.0815117	0.0743687	0.0302181	0.0221451	216.695	59.2504	46.75	18.5504	17.6406
G. ruber	806B 4 1 71-73	26.21	26.21	16.9589	1.24026		18.1452	0.209247			18.1452	0.209247		3.47406	102.3	12.6782	1.4376		26.3924	1.92378	35.1117	2229.93	8.09061	0.093821	0.0828691	0.0291913	0.0187501	318.296	96.21	71.5556	23.3018	22.4421
G. ruber	806B 4 1 131-133	26.81	26.81	16.0804	1.26695		18.2484	0.209247			18.2484	0.209247		3.86862	109.061	13.1677	1.44095		27.8305	1.89011	35.4811	2228.36	8.08693	0.0919903	0.0815913	0.0286343	0.0184569	319.593	95.4462	71.4422	23.3164	22.484
G. ruber	806B 5 1 41-43	35.41	35.41	16.5532	1.63758		20.1195	0.257084			20.1195	0.257084		3.84993	118.438	14.7023	1.459		30.7105	1.63793	35.6116	2206.77	8.2925	0.073411	0.068356	0.0262525	0.0183842	164.759	42.7999	34.6869	13.056	12.6216
G. ruber	806B 5 6 23-25	42.73	42.73	14.8973	1.9331		17.9667	0.257084			17.9667	0.257084		4.10858	110.531	13.8772	1.43994		28.3985	1.98028	35.4938	2191.34	8.03258	0.0989556	0.0868563	0.033036	0.0234593	367.89	116.906	85.8643	31.5476	29.7789
G. ruber	806B 6 2 0-2	46.01	46.01	16.3205	2.06202		19.34	0.334055			19.34	0.334055		5.0167	122.591	21.9478	1.41118		33.563	1.7233	35.3032	2184.03	8.16432	0.0810193	0.0743799	0.0320311	0.0249858	243.114	67.4892	53.5864	23.3713	21.9759
G. ruber	806B 6 7 24-26	53.75	53.75	25.0877	2.35805		19.4482	0.334055	19.2926	0.334055	19.3704	0.236212		3.77205	107.824	13.4161	1.41002		29.756	1.71487	35.6248	2176.03	8.20768	0.0789531	0.0722602	0.0267768	0.0181178	214.044	57.6724	45.5931	16.3499	15.8174
G. ruber	806B 7 1 24-26	54.24	54.24	17.936	2.37641		18.3813	0.334055	18.6311	0.334055	18.5062	0.236212		3.98152	109.522	14.8382	1.41021		29.2703	1.85095	35.388	2175.55	8.09937	0.0892702	0.0797983	0.0293377	0.0200285	299.654	87.8275	66.6896	23.5342	22.5706
G. ruber	806B 7 1 85-87	54.86	54.86	16.1397	2.39959		17.8465	0.269955			17.8465	0.269955		4.3457	100.143	12.8275	1.47161		29.4224	2.02376	35.1693	2174.9	7.99999	0.102446	0.0894282	0.0347337	0.0252325	402.103	131.77	95.7459	36.3529	34.0442
G. ruber	806B 7 2 38-40	55.89	55.89	17.9519	2.43793		16.9667	0.269955			16.9667	0.269955		3.79348	104.954	13.4007	1.4227		25.6572	2.42968	35.3646	2173.87	7.88607	0.13157	0.108865	0.0428575	0.0309588	551.165	225.785	147.975	56.7693	51.641
G. ruber	806B 7 2 63-65	56.14	56.14	14.2482	2.4472		18.4987	0.334055			18.4987	0.334055		3.96336	102.003	12.7851	1.40385		29.3012	1.88393	35.2512	2173.63	8.09835	0.0916711	0.0821481	0.0356324	0.0276568	300.713	90.1925	68.9358	30.1312	27.9619
G. ruber	806B 7 2 104-106	56.55	56.55	16.7133	2.46239		17.8714	0.334055	18.3671	0.334055	18.1192	0.236212		4.32807	105.991	18.8928	1.4103		29.7613	1.93567	35.3991	2173.22	8.03671	0.0959453	0.0846068	0.0309439	0.0212571	360.084	111.839	82.7703	29.0131	27.6642
G. ruber	806B 7 2 146-148	56.97	56.97	18.2442	2.47792		17.8928	0.334055			17.8928	0.334055		3.88963	106.615	12.7311	1.41069		28.0419	2.04246	35.1673	2172.79	8.02264	0.103228	0.0904462	0.0393842	0.0305604	376.578	123.965	90.9211	39.9693	36.5483
G. ruber	806B 7 3 5-7	57.06	57.06	19.1482	2.48125		18.7692	0.334055	18.1854	0.334055	18.4773	0.236212		3.95343	113.262	13.6304	1.40956		29.2236	1.85833	35.2924	2172.71	8.09579	0.0897741	0.0801632	0.0294668	0.0201255	302.803	89.1116	67.5383	23.8328	22.848
G. ruber	806B 7 3 58-60	57.59	57.59	21.5035	2.50079		18.269	0.334055			18.269	0.334055		3.68032	163.475	13.6323	1.40378		28.0706	1.94302	35.0044	2172.17	8.08041	0.0955915	0.0849751	0.0369598	0.0286447	318.559	98.4167	74.1965	32.485	30.0006
G. ruber	806B 7 3 78-80	57.79	57.79	19.004	2.50815		18.0005	0.334055			18.0005	0.334055		3.7943	104.476	13.3128	1.40819		27.9924	2.01231	35.0357	2171.98	8.0406	0.100868	0.0887677	0.03864	0.0299736	357.813	115.481	85.4222	37.5006	34.3974
G. ruber	806B 7 4 5-7	58.56	58.56	19.4697	2.53643		18.6039	0.334055	18.4561	0.334055	18.53	0.236212		3.71273	106.874	12.8442	1.41776		28.3491	1.8531	35.5483	2171.23	8.11149	0.0890284	0.0795986	0.0293529	0.0199596	288.458	84.2611	64.0609	22.6308	21.7123
G. ruber	806B 7 4 59-61	59.1	59.1	18.9743	2.55619		18.7564	0.334055	18.6229	0.334055	18.6897	0.236212		3.92188	117.072	12.8499	1.39601		29.6186	1.81741	35.0867	2170.69	8.12177	0.0867194	0.077954	0.0286916	0.0195817	280.146	80.3533	61.622	21.8436	20.9951
G. ruber	806B 7 4 105-107	59.56	59.56	17.3359	2.57299		18.8264	0.334055	18.6468	0.334055	18.7366	0.236212		4.06948	108.857	15.0914	1.40407		29.967	1.80604	35.5117	2170.23	8.12169	0.0860862	0.0774943	0.0285087	0.0194469	278.511	79.6019	61.1781	21.6966	20.8646
G. ruber	806B 8 2 59-61	65.6	65.6	15.7978	2.79014		18.1055	0.334055	17.6513	0.334055	17.8784	0.236212		4.06424	105.974	12.5959	1.40285		28.7046	2.01292	35.2835	2164.37	8.01023	0.101298	0.0883668	0.032343	0.0222158	388.121	125.872	91.3414	31.9428	30.3246
G. ruber	806B 8 5 9-11	69.6	69.6	19.3138	2.93055		16.6343	0.334055	17.2135	0.334055	16.9239	0.236212		3.95418	100.268	12.3657	1.37065		26.4788	2.44982	35.1334	2160.56	7.86631	0.133287	0.109605	0.0403435	0.0277774	579.881	241.117	155.895	54.4441	50.2858
G. ruber	806B 8 6 42-44	71.43	71.43	17.9361	2.99392		17.1824	0.334055			17.1824	0.334055		4.10275	109.638	12.7176	1.37652		27.7462	2.33417	34.8783	2158.86	7.9039	0.124981	0.10536	0.0462485	0.0358673	524.666	204.821	139.271	62.4589	55.5806
T. sacculifer	806A 1 1 3-5	0.03	0.03	20.49	0.0043		17.5341	0.355996			17.5341	0.355996		3.88743	76.6542	14.4011	1.3878		28.9673	0.874892	35.3834	2266.41	8.14947	0.0852289	0.0796086	0.0303814	0.0297074	256.277	74.2586	57.8257	26.1128	24.1664
T. sacculifer	806A 1 2 40-42	1.9	1.9	22.5062	0.0899		17.9509	0.355996			17.9509	0.355996		3.81159	78.8539	14.3591	1.36686		28.3244	0.875049	35.7754	2264.47	8.17893	0.0830447	0.0779814	0.0297353	0.0291327	233.273	66.3858	52.1177	23.5057	21.8203
T. sacculifer	806B 1 3 2-4	3.02	3.02	20.0816	0.147467		18.2388	0.257084	18.2946	0.257084	18.2667	0.181786		3.87043	79.1935	12.7415	1.34856		28.3312	0.874926	36.064	2263.18	8.2185	0.0764201	0.0721896	0.0176056	0.017557	205.371	54.8723	43.1544	13.4567	13.1647
T. sacculifer	806B 1 4 23-25	4.73	4.73	20.49	0.22725		17.3717	0.355996	17.4438	0.355996	17.4077	0.251727		4.2889	83.1035	14.954	1.34812		29.951	0.874194	36.1229	2261.37	8.11642	0.0844876	0.0784383	0.0231788	0.0228687	279.676	80.4497	61.7776	22.3366	21.3264
T. sacculifer	806B 3 1 26-28	16.26	16.26	20.92	0.7941		19.2624	0.257084			19.2624	0.257084		4.04661	77.2515	11.1726	1.37079		29.1353	0.87459	36.1064	2248.56	8.2766	0.0732412	0.0701849	0.0212988	0.0211654	168.647	44.2868	35.6122	13.2135	12.7297
T. sacculifer	806B 3 1 31-33	16.31	16.31	20.3631	0.7961		18.7095	0.257084			18.7095	0.257084		3.81054	81.7234	11.8094	1.37248		28.1748	0.875051	36.0966	2248.51	8.24367	0.0759428	0.0721624	0.0218378	0.0216585	188.399	50.3607	40.0621	14.8184	14.2435
T. sacculifer	806B 3 1 91-93	16.91	16.91	20.9146	0.823636		18.1548	0.257084			18.1548	0.257084		3.74517	74.9381	10.2835	1.34442		28.201	0.875194	35.752	2247.88	8.19276	0.0798026	0.0750124	0.0226162	0.0223724	221.896	61.1277	47.888	17.6472	16.9036
T. sacculifer	806B 3 2 56-58	18.06	18.06	22.5642	0.88145		18.5937	0.257084			18.5937	0.257084		3.19205	75.9538	11.2369	1.38126		25.6299	0.876775	35.7574	2246.59	8.25143	0.077584	0.073376	0.0221979	0.0219934	186.577	50.2261	39.7296	14.6835	14.0965
T. sacculifer	806B 3 3 11-13	19.11	19.11	19.2866	0.92975		17.5622	0.289797			17.5622	0.289797		3.57334	68.1813	11.7048	1.36014		27.4725	0.875608	35.7419	2245.48	8.15513	0.0844875	0.0786521	0.0257528	0.0253246	249.449	71.4944	55.2699	21.8321	20.6225
T. sacculifer	806B 3 4 16-18	20.66	20.66	21.9626	0.98989		17.287	0.209247			17.287	0.209247		3.52138	75.6045	11.4753	1.36351		27.2945	0.875745	35.6882	2244.13	8.11326	0.0873681	0.0803238	0.0208543	0.0206361	283.163	82.9714	62.6824	20.4621	19.7503
T. sacculifer	806B 3 4 21-23	20.71	20.71	21.8555	0.99194		18.9402	0.289797			18.9402	0.289797		3.40856	100	10.7642	1.3735		26.844	0.876064	35.6028	2244.08	8.27149	0.075925	0.0723173	0.0237848	0.0235447	174.312	46.5234	37.2045	14.7545	14.0689
T. sacculifer	806B 3 5 31-33	22.31	22.31	18.2065	1.04834		18.6868	0.289797			18.6868	0.289797		3.22411	77.2118	10.5283	1.3062		25.9548	0.87666	35.6058	2241.11	8.27991	0.0760454	0.0724069	0.0238208	0.0235787	170.203	45.392	36.2937	14.3987	13.7301
T. sacculifer	806B 4 1 56-58	26.06	26.06	22.1965	1.23336		17.2919	0.209247			17.2919	0.209247		4.07316	81.8991	10.6294	1.38034		29.7693	0.874543	35.5954	2230.34	8.08196	0.0877374	0.0805904	0.0208985	0.0206751	307.776	90.8879	68.5256	22.403	21.6183
T. sacculifer	806B 4 1 146-148	26.96	26.96	23.9894	1.27354		17.0826	0.209247			17.0826	0.209247		3.60761	74.9448	10.18	1.34358		27.8108	0.87552	35.6051	2227.95	8.07075	0.0915647	0.0833566	0.0215087	0.0212401	318.857	97.0344	72.1116	23.4623	22.5836
T. sacculifer	806A 4 4 35-37	30.35	30.35	20.49	1.42679		16.895	0.355996			16.895	0.355996		4.24421	79.169	13.6304	1.3698		30.3304	0.874262	35.7551	2219.05	8.04382	0.094669	0.0865627	0.0331414	0.0321421	342.126	107.762	81.0441	36.9678	33.7853
T. sacculifer	806B 10 2 77-79	84.77	84.77	16.1526	3.44005		16.6664	0.355996	16.5406	0.355996	16.6035	0.251727		3.81601	67.3557	10.5848	1.26399		29.3325	0.875039	35.3669	2147.52	8.04856	0.0931202	0.0847235	0.0249042	0.024447	327.582	101.541	75.5188	27.6015	26.1982
T. sacculifer	806B 10 3 137-139	86.87	86.87	18.3381	3.50787		16.1752	0.355996	16.1283	0.355996	16.1518	0.251727		3.98847	75.2686	11.02	1.28885		30.0305	0.874696	35.3985	2145.8	7.97612	0.101867	0.0909434	0.0266308	0.0260108	404.186	135.098	97.2013	35.3898	33.3195
T. sacculifer	806B 11 1 117-119	93.17	93.17	18.6476	3.70764		15.3482	0.355996			15.3482	0.355996		4.02381	79.8784	10.8563	1.3253		30.295	0.874631	35.3012	2140.72	7.87478	0.122373	0.105984	0.0412342	0.0391542	538.396	211.749	144.581	68.1406	60.068
T. sacculifer	806B 12 5 120-122	108.7	108.7	20.7978	4.17801		15.5607	0.355996			15.5607	0.355996		3.40562	78.7324	11.1442	1.30234		27.5858	0.876073	35.4236	2128.62	7.91661	0.120038	0.104412	0.0405644	0.0385843	474.075	182.573	125.739	59.14	52.3225
T. sacculifer	806B 14 2 80-82	122.8	122.8	20.3398	4.58075		15.5255	0.355996			15.5255	0.355996		3.08536	69.6228	10.2552	1.2591		26.1423	0.87718	35.338	2118.02	7.93494	0.119796	0.10425	0.0405035	0.0385348	447.637	171.734	118.42	55.7177	49.3292
T. sacculifer	806B 14 6 0-2	128	128	22.3474	4.72408		16.5657	0.355996	16.5376	0.355996	16.5516	0.251727		3.64138	78.7767	11.5405	1.22635		28.7758	0.875437	35.4133	2114.26	8.01089	0.0988942	0.0888489	0.0260477	0.0254846	359.862	117.194	85.311	31.2329	29.5086
T. sacculifer	806B 15 4 79-81	135.29	135.29	23.3025	4.92075		15.8197	0.355996			15.8197	0.355996		3.73125	64.6079	10.4597	1.20796		29.2194	0.875225	35.3974	2109.08	7.91367	0.11701	0.102353	0.0396814	0.037827	474.273	178.949	124.514	58.4414	51.9269
T. sacculifer	806B 16 3 139-141	143.89	143.89	27.0694	5.14685		15.6455	0.355996			15.6455	0.355996		3.69452	72.8067	10.3875	1.21861		29.106	0.87531	35.3924	2099.59	7.86148	0.12801	0.109737	0.0428615	0.0405367	546.132	223.91	150.035	71.341	62.4783
T. sacculifer	806B 25 3 29-31	228.29	228.29	23.0824	7.14878		16.402	0.355996			16.402	0.355996		3.41354	73.8495	9.57702	1.1321		28.2663	0.87605	35.3132	1983.94	8.05257	0.0969262	0.0882132	0.0338211	0.0327443	298.094	95.9899	71.7773	33.4502	30.6271
T. sacculifer	806B 29 5 30-32	269.3	269.3	29.4589	8.07135		16.1	0.355996	16.0269	0.355996	16.0635	0.251727		3.81264	66.3588	10.2756	1.1243		30.3118	0.875046	35.204	1915.75	7.97586	0.101703	0.0908386	0.0266051	0.0259895	359.349	120.897	87.2161	32.8794	31.1088
T. sacculifer	806B 30 1 30-32	272.81	272.81	29.0815	8.15103		16.155	0.15			16.155	0.15		3.77382	78.6261	9.14319	1.17708		30.1108	0.87513	35.2618	1915.81	7.99335	0.0976224	0.0873577	0.0180321	0.0179113	341.338	110.966	80.077	23.9505	23.4943
T. sacculifer	806B 30 5 30-32	278.81	278.81	31.1788	8.28775		16.4019	0.15	16.8505	0.15	16.6262	0.106066		5.11236	117.553	14.2952	1.74958		34.9496	0.873241	35.3561	1915.9	7.97832	0.0918402	0.0831069	0.0147775	0.014793	354.701	110.681	81.2339	22.6335	22.4401
T. sacculifer	806B 31 5 32-34	288.32	288.32	25.8355	8.50602		16.1857	0.355996	16.5955	0.355996	16.3906	0.251727		3.25964	108.17	8.56694	1.14831		27.7868	0.876538	35.2909	1916.05	8.0782	0.0918364	0.0838102	0.0246652	0.0242326	266.437	82.1873	61.5807	23.4212	22.3585
T. sacculifer	806B 32 2 29-31	293.3	293.3	30.0648	8.62119		16.0581	0.15	16.3495	0.15	16.2038	0.106066		3.63772	60.4874	9.08377	1.14287		29.6831	0.875446	35.1697	1916.13	8.01162	0.0953795	0.0856061	0.0149932	0.0150003	324.027	103.254	74.8301	20.5979	20.4137
T. sacculifer	806B 33 2 30-32	302.8	302.8	28.7452	8.84282		16.1009	0.355996			16.1009	0.355996		3.77937	70.5914	8.88205	1.1115		30.3657	0.875118	35.1389	1916.29	8.009	0.0997483	0.0902569	0.0346465	0.0334677	326.462	108.214	80.1178	37.6419	34.3794
T. sacculifer	806B 33 5 30-32	307.31	307.31	29.5945	8.94899		15.3479	0.15			15.3479	0.15		3.69815	64.9271	8.42209	1.14448		29.8184	0.875301	35.3868	1916.36	7.92438	0.108822	0.0950591	0.0191699	0.0189726	416.127	148.505	102.615	29.8047	29.112
T. sacculifer	806B 34 5 30-32	316.8	316.8	25.8851	9.17459		15.896	0.355996			15.896	0.355996		4.46501	82.4144	9.77075	1.12719		33.1309	0.873946	35.1193	1912.6	7.98587	0.0986549	0.0894699	0.0343254	0.0331864	347.887	114.848	85.3074	40.0693	36.6418
T. sacculifer	806B 35X 5 30-32	320.3	320.3	24.7887	9.2586		14.6723	0.355996			14.6723	0.355996		4.06269	75.2864	10.07	1.19301		31.3971	0.874562	35.3785	1910.78	7.87204	0.120478	0.104721	0.0406857	0.0386876	481.775	188.365	129.654	61.9189	54.9971
T. sacculifer	806B 36X 1 32-34	330.03	330.03	28.4057	9.49455		15.3206	0.218107			15.3206	0.218107		3.87644	94.3557	9.22893	1.18943		30.6446	0.874914	35.4216	1905.66	7.93879	0.106011	0.0935935	0.0245416	0.0240374	396.888	138.574	97.7955	33.9555	32.424
T. sacculifer	806B 44X 5 34-36	413.54	413.54	25.8006	11.693		14.9288	0.355996			14.9288	0.355996		4.69849	72.5311	12.0787	1.12718		34.3545	0.873658	35.1663	1803.8	7.9197	0.106331	0.0949558	0.0365754	0.0351498	396.464	140.125	101.372	48.3527	43.88
T. sacculifer	806B 46X 1 33-35	426.84	426.84	20.8083	12.0743		14.5149	0.218107			14.5149	0.218107		4.86997	91.841	13.2985	1.16128		35.1258	0.873473	35.0201	1776.16	7.90429	0.103869	0.0921209	0.0242036	0.0237327	408.48	141.778	100.933	36.1161	34.6307
T. sacculifer	806B 46X 5 33-35	432.84	432.84	32.8516	12.2491		14.9725	0.218107			14.9725	0.218107		4.46362	120.537	12.9566	1.20162		33.4779	0.873948	35.3332	1755	7.88319	0.110129	0.0964144	0.0252308	0.0246643	427.279	155.814	108.41	38.6897	36.9551
T. sacculifer	806B 47X 3 34-36	439.44	439.44	28.3815	12.4434		14.7202	0.355996			14.7202	0.355996		4.63676	79.2287	20.6309	1.20289		34.1046	0.87373	35.3566	1731.41	7.8814	0.113038	0.0996417	0.0385285	0.0368382	423.315	158.123	111.83	53.9715	48.6455
T. sacculifer	806B 48X 2 34-36	447.64	447.64	29.5916	12.6876		16.3986	0.289797			16.3986	0.289797		4.53679	92.363	15.2152	1.2978		34.1715	0.873853	34.9242	1701.62	8.05678	0.0873143	0.0807553	0.0264242	0.0259355	247.529	75.2536	57.7681	24.8037	23.6067
T. sacculifer	806B 48X 5 34-36	452.15	452.15	26.7207	12.8232		14.8642	0.249881			14.8642	0.249881		4.12909	212.935	14.4688	1.2386		32.4167	0.874448	35.2218	1685.2	7.93227	0.104779	0.0929835	0.0270549	0.0263906	355.412	124.317	88.8471	34.7847	33.0291
T. sacculifer	806B 50X 2 32-34	465.43	465.43	25.673	13.2276		13.8485	0.355996			13.8485	0.355996		4.49197	74.9545	11.9227	1.24539		34.1189	0.87391	34.9063	1648.66	7.79646	0.130781	0.111577	0.0436666	0.0412217	513.845	219.351	146.133	72.0829	63.6489
T. sacculifer	806B 51X 2 29-31	475.1	475.1	27.1408	13.5267		14.093	0.218107			14.093	0.218107		4.25392	68.5293	12.663	1.26097		33.0661	0.874247	35.1647	1628.96	7.8279	0.121832	0.104208	0.0271806	0.0264272	462.665	185.542	123.885	45.0347	42.8054
T. sacculifer	806B 52X 2 31-33	484.41	484.41	28.4802	13.8181		14.5414	0.257084			14.5414	0.257084		4.94442	67.6383	11.0337	1.17979		35.7632	0.873398	34.9099	1609.78	7.84675	0.113428	0.0989774	0.0294418	0.0285533	435.001	164.234	113.907	45.7064	43.0415
T. sacculifer	806B 52X 4 33-35	487.44	487.44	30.0105	13.9136		14.5716	0.249881			14.5716	0.249881		5.06049	92.8085	14.9295	1.14776		36.1278	0.873288	34.9394	1603.45	7.83413	0.114793	0.0998349	0.0290345	0.0281705	449.132	171.538	118.219	46.72	44.0809
T. sacculifer	806B 56X 2 35-37	523.15	523.15	26.8991	15.0607		13.5243	0.289797			13.5243	0.289797		4.76414	64.5853	10.8855	1.13386		35.5145	0.873585	34.7453	1663.7	7.73151	0.140702	0.117049	0.0387719	0.0368186	624.031	286.412	181.456	77.7435	70.0853
T. sacculifer	806B 58X 2 33-35	542.33	542.33	30.0356	15.6887		14.4662	0.209247			14.4662	0.209247		4.8631	59.0294	12.8372	1.09378		35.954	0.87348	34.7397	1687.32	7.8307	0.115103	0.0996963	0.0252523	0.0246698	479.808	182.927	124.83	44.0879	42.1803
T. sacculifer	807A 1 1 20-22	0.2	0.2	21.2913	0.00984		18.3829	0.209247	18.1687	0.209247	18.2758	0.14796		4.23532	87.466	12.5387	1.42174		30.5108	0.874276	35.3166	2266.41	8.19507	0.0762277	0.0719335	0.0158209	0.0158272	221.425	59.125	46.3576	13.4222	13.2213
T. sacculifer	807A 1 1 30-32	0.3	0.3	19.823	0.0142		18.7392	0.257084			18.7392	0.257084		4.27282	100.775	13.6626	1.44612		30.4574	0.874218	35.5422	2266.36	8.24285	0.0745462	0.0711412	0.0215683	0.021414	189.708	50.3086	40.2291	14.8688	14.3034
T. sacculifer	807A 1 1 90-92	0.9	0.9	20.4517	0.04659		19.0766	0.257084			19.0766	0.257084		3.46588	88.885	12.9295	1.39557		27.0052	0.875898	35.6369	2266.07	8.3065	0.0731082	0.0700952	0.0213033	0.021175	157.301	41.0115	33.0264	12.231	11.7852
T. sacculifer	807A 1 2 0-2	1.5	1.5	16.6339	0.07897		18.3564	0.289797			18.3564	0.289797		3.44352	91.353	11.2401	1.37879		27.1692	0.875962	35.3357	2265.78	8.26604	0.0761546	0.0724903	0.0238424	0.0235982	179.548	47.9669	38.3218	15.1553	14.4435
T. sacculifer	807A 1 3 0-2	3	3	16.75	0.18204		17.1279	0.289797			17.1279	0.289797		3.25553	85.2177	12.0783	1.38543		25.9715	0.876552	35.6939	2265.01	8.1652	0.0852276	0.0792024	0.0259384	0.025495	245.308	70.51	54.3744	21.4279	20.2223
T. sacculifer	807A 1 3 90-92	3.9	3.9	22.2174	0.2272		17.7485	0.257084	17.5339	0.257084	17.6412	0.181786		3.96188	79.1733	11.4887	1.39139		29.0644	0.874746	35.789	2264.53	8.14345	0.0819338	0.0762345	0.0183084	0.018215	259.519	72.6924	55.8857	17.1678	16.7465
T. sacculifer	807A 1 3 100-102	4	4	20.49	0.2312		16.8265	0.209247			16.8265	0.209247		3.99139	83.4458	11.2627	1.40529		29.3564	0.874691	35.592	2264.49	8.07268	0.0893101	0.0817326	0.0211461	0.0209042	321.853	96.1948	72.0744	23.3675	22.5136
T. sacculifer	807A 2 4 0-2	11.9	11.9	20.1238	0.342		17.8546	0.257084			17.8546	0.257084		3.58081	72.0322	9.80805	1.35054		27.3337	0.875588	35.9285	2258.77	8.18868	0.0808865	0.0758146	0.0228343	0.0225719	226.122	62.7637	48.9643	17.9948	17.2174
T. sacculifer	807A 2 5 0-2	13.4	13.4	22.2701	0.43081		17.6733	0.289797			17.6733	0.289797		3.81842	79.4736	10.3968	1.38734		28.3496	0.875034	35.9712	2256.76	8.14461	0.0844151	0.0785982	0.0257247	0.025297	257.662	73.9424	57.1554	22.5407	21.2884
T. sacculifer	807A 2 6 0-2	14.9	14.9	23.7832	0.604		17.6381	0.257084			17.6381	0.257084		4.20533	66.6295	9.44599	1.33062		30.1438	0.874323	35.7365	2252.85	8.1082	0.0853856	0.0791273	0.0237283	0.0233872	286.697	83.0855	63.6409	23.318	22.213
T. sacculifer	807A 3 2 0-2	18.4	18.4	22.9587	0.857		17.8576	0.257084			17.8576	0.257084		3.72868	88.179	10.959	1.38388		28.6063	0.875231	35.3293	2247.13	8.15044	0.083254	0.0775612	0.0233182	0.0230163	253.617	71.9017	55.5722	20.4239	19.5007
T. sacculifer	807A 3 3 0-2	19.9	19.9	23.0722	0.93967		17.5613	0.209247	17.1402	0.209247	17.3508	0.14796		3.79813	83.3888	10.6942	1.3734		28.8327	0.875077	35.4291	2245.26	8.09674	0.0865264	0.0794407	0.016799	0.0167503	297.611	86.6682	65.1727	18.3024	17.9705
T. sacculifer	807A 3 7 0-2	25.9	25.9	23.1613	1.278		17.9142	0.257084			17.9142	0.257084		4.14938	85.0066	11.1473	1.34699		30.2461	0.874414	35.518	2227.72	8.13074	0.0832383	0.0775475	0.0233024	0.0229995	265.028	75.4421	58.285	21.4735	20.505
T. sacculifer	807A 7 6 10-12	62.51	62.51	22.0916	3.04732		16.159	0.334055			16.159	0.334055		3.908	65.9178	12.581	1.28539		29.9561	0.874851	35.1245	2157.51	7.94912	0.108748	0.0964359	0.0353487	0.034	440.5	155.616	110.913	49.1049	44.4483
T. sacculifer	807A 8 3 0-2	67.41	67.41	19.606	3.21786		15.2977	0.249881			15.2977	0.249881		3.96782	118.464	10.3021	1.29361		30.2731	0.874735	35.0785	2153.16	7.85902	0.122577	0.104982	0.0305367	0.029505	567.082	223.684	149.123	54.0148	49.92
T. sacculifer	807A 8 5 0-2	70.41	70.41	20.0756	3.32499		15.4308	0.249881			15.4308	0.249881		3.90312	63.092	9.42491	1.27938		29.9848	0.87486	35.1282	2150.44	7.87608	0.119669	0.103066	0.0299697	0.0290009	539.596	208.068	140.187	50.7559	47.0382
T. sacculifer	807A 9 4 0-2	78.41	78.41	19.5313	3.61514		15.5512	0.139736			15.5512	0.139736		3.40434	86.2752	8.90428	1.29017		27.8712	0.876077	35.0853	2143.08	7.9219	0.11329	0.0979769	0.0187812	0.0186004	471.96	172.857	117.07	30.8479	30.0891
T. sacculifer	807A 13 4 0-2	116.41	116.41	24.9344	4.52418		15.1432	0.139736			15.1432	0.139736		3.15427	61.7408	9.05242	1.20245		26.8361	0.876914	35.0554	2119.52	7.83485	0.134859	0.111756	0.0208177	0.0204898	592.244	256.007	159.987	40.9809	39.6429
mcd: meter composite depth
mbsf: meter below seafloor depth
Shell Wt: Average weight of individual shel
SST: Sea surface Temperature determined from Mg/Ca ratios, see text for calculations
error: propagated error with associated parameter
Salinity: see text for calculations
TA: Total Alkalinity from Caves et al. (2016)
pH: pH calculated based on boron isotopes from this study, see text for calculations
pCO2: Calcluated pCO2 from pH and TA, see text for calculations
error (1): Propagated error for pH and pCO2 calculated from eq. S14 and eq. S16, respectively
error (2): Propagated error for pH and pCO2 calculated from eq. S15 and eq. S17, respectively
up: propagated error above symbol
down: propagated error below symbol
