# Supplementary material for: Atmospheric CO 2 estimates for the Miocene to Pleistocene based on foraminiferal δ 11 B at Ocean Drilling Program Sites 806 and 807 in the Western Equatorial Pacific
Source: Copernicus journal article supplement (doi:10.5194/cp-2020-158), 2021-02-08
Supplement: Supplementary file 2 [file cp-2020-158-supplement.zip]

**SUPPLEMENTAL INFORMATIONS**

**Atmospheric CO<sub>2</sub> estimates for the Miocene to Pleistocene based on foraminiferal  $\delta^{11}\text{B}$   
at Ocean Drilling Program Sites 806 and 807 in the Western Equatorial Pacific**

Maxence Guillermic<sup>1,2</sup>, Sambuddha Misra<sup>3,4</sup>, Robert Eagle<sup>1,2</sup>, Aradhna Tripathi<sup>1,2</sup>

<sup>1</sup>Department of Atmospheric and Oceanic Sciences, Department of Earth, Planetary, and  
Space Sciences, Center for Diverse Leadership in Science, Institute of the Environment and  
Sustainability, University of California – Los Angeles, Los Angeles, CA 90095 USA

<sup>2</sup>Laboratoire Géosciences Océan UMR6538, UBO, Institut Universitaire Européen de la Mer,  
Rue Dumont d'Urville, 29280, Plouzané, France

<sup>3</sup>The Godwin Laboratory for Palaeoclimate Research, Department of Earth Sciences,  
University of Cambridge, UK

<sup>4</sup>Indian Institute of Science, Centre for Earth Sciences, Bengaluru, Karnataka 560012, India

## Supplemental Methods

### S1. Potential contamination

We found no evidence for contamination of TE (including Mg/Ca) arising from the presence of silicate minerals or Mn-Fe-Oxide coatings. Contamination of samples by silicate minerals was monitored using Fe/Mg ratios. Samples with Fe/Mg > 0.1 mol/mol are typically rejected due to potential contamination by silicate minerals (Barker et al., 2003). Our samples have an average Fe/Mg of  $0.034 \pm 0.07$  mol/mol (2 SD, n=106), indicating that silicate minerals have been efficiently removed during our cleaning. Contamination by clays was monitored using Ti/Ca no correlations were found between Ti/Ca and Mg/Ca ( $R^2=0.0066$ ) or with B/Ca ( $R^2=0.0237$ ). Contamination by Mn-Fe oxides is detected using Mn/Ca ratios and Fe/Ca ratios. Our samples have Mn/Ca ratios of  $0.12 \pm 0.11$  mmol/mol (2 SD, n=108) consistent with previous published data of cleaned samples (Wara et al., 2005). No correlations was observed between Mg/Ca and Fe/Ca ( $R^2=0.0841$ ) or between Mg/Ca and Mn/Ca ( $R^2=0.0161$ ). No significant correlation was observed between B/Ca and Mn/Ca ( $R^2=0.0011$ ) or B/Ca and Fe/Ca ( $R^2=0.0132$ ) ratios.

### S2. Calculations of temperature, salinity, pH, and $pCO_2$

Analyses of  $\delta^{11}B$ ,  $\delta^{18}O$  and elemental ratios (eg., Mg/Ca, B/Ca) were used to reconstruct the chemical and physical properties of seawater over the last 17 My of the Western Equatorial Pacific (Fig. 2).

#### S2.1. Salinity reconstruction

Salinity was reconstructed using the relative sea level (RSL) reconstruction from Stap et al. (2017) and equation S1:

$$S=S_{\text{modern}}/3800*(3800+RSL) \quad \text{eq. S1}$$

$S_{\text{modern}}$  is the modern salinity corresponding to the depth habitat of the foraminifera at the site of interest. The depths used were 125 m for *T. sacculifer* and 80m for *G. ruber* (Rickaby et al., 2005; Guillermic et al., 2020). At Site 806, values for  $S_{\text{modern}}$  of 35.38 was used for *T. sacculifer* and 35.01 was used for *G. ruber*. At Site 807, a value of 35.05 was used for *T. sacculifer*.

## S2.2. Temperature

Paleotemperatures were calculated using Mg/Ca ratios of planktic foraminifera. A number of factors have been shown to impact Mg/Ca ratios and calculated paleotemperature. Factors identified in prior studies include salinity and pH effects on Mg/Ca, seawater Mg/Ca ratios, cleaning methodology, dissolution, and basin-specific equations, as discussed in more detail below. Below we describe some of the prior work that was factored into the regional mono-specific equations we used for calculating temperature from Mg/Ca.

### S2.2.1. Prior work showing evidence for salinity and pH effects on Mg/Ca-T

Studies have found that Mg/Ca ratios in foraminifera are impacted by salinity (Nürnberg et al., 1996; Hönisch et al., 2013) and pH or  $[\text{CO}_3^{2-}]$  (Russell et al., 2004; Kisakürek et al., 2008; Evans et al., 2016; Gray et al., 2018; Gray and Evans, 2019). Based on culture experiments, Gray and Evans (2019) reported impacts of both salinity and pH on *G. ruber* but only a salinity effect on *T. sacculifer*, and derived the following equations:

$$\text{SST } (T. \text{ sacculifer}) = (\text{Ln}(\frac{\text{Mg}}{\text{Ca}} \text{ test}) - 0.054 * (S - 35) + 0.24)/0.062 \quad \text{eq. S2}$$

$$\text{SST } (G. \text{ ruber}) = (\text{Ln}(\frac{\text{Mg}}{\text{Ca}} \text{ test} - 0.036 * (S - 35) + 0.87 * (\text{pH} - 8) + 0.03)/0.064 \quad \text{eq. S3}$$

### S2.2.2. Prior work showing evidence for variations in Mg/Ca ratios of seawater

Over timescales of  $10^6$ - $10^7$  years,  $\text{Mg}/\text{Ca}_{\text{sw}}$  can vary. Evidence from evaporites, carbonate veins, fossil corals and models suggests that seawater  $\text{Mg}/\text{Ca}_{\text{sw}}$  ratios have varied through time with variations of  $\sim 3$  mol/mol (Horita et al., 2002; DeFante and Paolo, 2006; Coggon et al., 2011; Brennan et al., 2013; Gothman et al., 2015). These studies do not agree on the timing of changes in  $\text{Mg}/\text{Ca}_{\text{sw}}$ . Gothman et al. (2015) made measurements of corals and also compiled different seawater archives including carbonate veins, gastropods, brachiopods, fish teeth, and found that values of  $\text{Mg}/\text{Ca}_{\text{sw}}$  of 2.5 mol/mol occurred  $\sim 25$  My. To correct for secular variations in  $\text{Mg}/\text{Ca}_{\text{sw}}$  we used the approach of O'Brien et al. (2014), theoretical work from Evans and Muller, (2012), and the  $\text{Mg}/\text{Ca}_{\text{sw}}$  record of Gothman et al. (2015). The equations we utilized are adapted from Dekens et al. (2002):

$$\text{SST } (T. \text{ sacculifer}) = (\text{Ln}(\frac{\text{Mg}}{\text{Ca}} \text{ test} * \frac{\text{Mg}^H}{\text{Ca}} \text{ sw}_{t0}) - \text{Ln}(0.37 * \frac{\text{Mg}^H}{\text{Ca}} \text{ sw}_t))/0.09 + 0.36 * C + D$$

eq. S4

$$SST (G. ruber) = (Ln(\frac{Mg}{Ca} test * \frac{Mg^H}{Ca} sw_{t0}) - Ln(0.37 * \frac{Mg^H}{Ca} sw_t))/0.09 + 0.61 * C + D \quad \text{eq. S5}$$

Specifically H refers to the power components of the power law relationship between the Mg partition coefficient and Mg/Ca<sub>sw</sub>, with a value of 0.41 for *T. sacculifer* (Delaney et al., 1985) which we also assume is the same for *G. ruber*. C is the depth of the site. D refer to a basin-specific offset, which is 2 °C for *T. sacculifer* and 2.9 °C for *G. ruber* for the Pacific Ocean, (Table S1).

### S2.2.3. Prior work on reductive cleaning effects on Mg/Ca

The use of a reductive step in cleaning has been shown to lower Mg/Ca<sub>test</sub> ratios in planktic (Barker et al., 2003; Bian et al., 2010; Johnstone et al., 2016) and benthic foraminifera (Yu et al., 2007a), and contribute to offsets between studies using different methodologies. A decrease in Mg/Ca<sub>test</sub> of 6-9% was reported for *T. sacculifer* by Bian et al. (2010), and of 5% by Johnstone et al. (2016). A decrease of 4% was reported for *G. ruber* by Johnstone et al. (2016).

### S2.2.4. Mg/Ca-SST equations used for this study

Based on the above equations from Gray and Evans (2019) (eq. S2 and S3), we incorporated a term to account for changes in the Mg/Ca ratio of seawater, and based on results from Dekens et al., (2002) we incorporated two terms to account for dissolution (C) and basin-specific offsets (D), and used an iterative approach for our calculations to account for pH effect on *G. ruber* (Gray and Evans, 2019). The equations we used are:

$$SST (T. sacculifer) = \frac{Ln\left(\left(\frac{Mg}{Ca} test * 1.05 * \frac{Mg^H}{Ca} sw_{t0}\right) - 0.054 * (S-35) + 0.24\right)}{0.062} + 0.36 * C + 2.0 \quad \text{eq. S6}$$

$$SST (G. ruber) = \frac{Ln\left(\left(\frac{Mg}{Ca} test * 1.05 * \frac{Mg^H}{Ca} sw_{t0}\right) - 0.036 * (S-35) + 0.87 * (pH-8) + 0.03\right)}{0.064} + 0.61 * C + 2.9 \quad \text{eq. S7}$$

With H being the power components of the power relationship between the Mg partition coefficient and Mg/Ca<sub>sw</sub>, 0.41 for *T. sacculifer* (Delaney et al., 1985). We use the same value for *G. ruber*. C is the depth of the core (km). In order to take the impact of reductive cleaning

into account we applied a decrease of 5% for *G. ruber* and *T. sacculifer* (Bian et al., 2010 and Johnstone et al., 2016).

Given evidence for a pH effect on Mg/Ca-SST calibration for *G. ruber*, we used an iterative approach for our calculations, following Gray and Evans, (2019). Up to 4 iterations were needed to achieve a difference in SST with the previous iteration of  $<0.05^{\circ}\text{C}$  and a difference in pH of  $<0.001$ . For this iterative approach, we first calculate  $\text{pH}_1$  from foraminiferal  $\delta^{11}\text{B}$ , then calculate  $\text{SST}_1$  from  $\text{pH}_1$ , then calculate  $\text{pH}_2$  with  $\text{SST}_1$ , and then repeat.

### **S2.3. $\delta^{11}\text{B}_{\text{borate}}$ from $\delta^{11}\text{B}_{\text{carbonate}}$**

The use of  $\delta^{11}\text{B}$  in foraminiferal carbonate to calculate seawater  $\delta^{11}\text{B}_{\text{borate}}$ , and derived pH and  $\text{pCO}_2$  values, has been shown to accurately replicate  $\text{pCO}_2$  records independently determined from ice cores and using oceanographic data, if several factors are taken into account (Chalk et al., 2017; Guillermic et al., 2020). These factors include mono-specific calibrations, size fraction or shell weight, basin, and water depth. In order to accurately reconstruct seawater pH (and  $\text{pCO}_2$ ) from  $\delta^{11}\text{B}$  of foraminifera, mono-specific calibrations are needed to convert  $\delta^{11}\text{B}_{\text{carbonate}}$  to  $\delta^{11}\text{B}_{\text{borate}}$ . Recent culture and field-based calibrations have refined the sensitivities of  $\delta^{11}\text{B}_{\text{carbonate}}$  to  $\delta^{11}\text{B}_{\text{borate}}$  for different foraminiferal species (Henahan et al., 2016; Raitzsch et al., 2018; Guillermic et al., 2020). For *T. sacculifer* and *G. ruber*, the sensitivities of  $\delta^{11}\text{B}_{\text{carbonate}}$  to  $\delta^{11}\text{B}_{\text{borate}}$  are 0.82 and 0.58, respectively (Raitzsch et al., 2018; Guillermic et al., 2020). As with Mg/Ca, the intercepts are prone to large uncertainties and are commonly adjusted based on core-top data, in order to yield the expected pre-industrial pH or  $\text{pCO}_2$  value at the site being examined (Chalk et al., 2017; Sosdian et al., 2018). The rationale for this correction is the impact of the depth habitat on microenvironment pH and subsequent  $\delta^{11}\text{B}_{\text{carbonate}}$  (Hönisch and Hemming, 2004; Guillermic et al., 2020) and/or preferential dissolution of gametogenic calcite (Ni et al., 2007). It is also possible that these offsets may reflect observed size effects on *G. ruber* as well as *T. sacculifer* (Henahan et al., 2013; Hönisch et al., 2019). For *T. sacculifer*, a relationship between shell size and  $\delta^{11}\text{B}_{\text{carbonate}}$  has been observed in the WEP (Hönisch and Hemming, 2004; Ni et al., 2007). Hönisch and Hemming, (2004) also reported that values for the 515-865  $\mu\text{m}$  size fraction yielded values of 21.76 ‰, and determined a size-fraction specific relationship. Here, we modify this approach to develop a shell-weight specific relationship:

$$\text{Size offset (‰)} = 21.76 - (0.06522 * \text{Weight/shell } (\mu\text{g}) + 17.38) \quad \text{eq. S8}$$

We adapted the equation for *T. sacculifer* from Guillermic et al. (2020):

$$\delta^{11}\text{B}_{\text{borate}} = [(\delta^{11}\text{B}_{T. \text{ sacculifer}} + \text{Size offset}) - 4.09 (\pm 0.86)] / 0.83 (\pm 0.48) \quad \text{eq. S9}$$

Due to the lack of coretop measurements for *G. ruber* from this study, we selected three control points at Marine isotope stages (MIS) 30, 37 and 39 (Lisiecky and Raymo, 2005) times when both *T. sacculifer* and *G. ruber* were measured to determine appropriate offsets for both Mg/Ca and  $\delta^{11}\text{B}$  that yield (Table S1 and S2) the best agreement between the species. This was used to adapt the equation from Guillermic et al. (2020) for *G. ruber*:

$$\delta^{11}\text{B}_{\text{borate}} = [(\delta^{11}\text{B}_{G. \text{ ruber}} + 2.0) - 9.11 (\pm 0.73)] / 0.58 (\pm 0.91) \quad \text{eq. S10}$$

## S2.4. Constants

Temperature, salinity and pressure were used to calculate the different dissociation constants and parameters. We used  $K_1$ ,  $K_2$  from Lueker et al. (2000),  $K_B$  from Dickson, (1990),  $\text{KSO}_4$  from Dickson, (1990),  $\text{KF}$  from Peres and Fraga, (1987) and total boron from Lee et al. (2010).

## S2.5. pH calculations

The quantitative estimation of pH using downcore  $\delta^{11}\text{B}_{\text{carbonate}}$  requires: 1) calculations of the borate isotopic composition of seawater ( $\delta^{11}\text{B}_{\text{borate}}$ ), 2) constraints on the secular variation of the boron isotopic composition of seawater ( $\delta^{11}\text{B}_{\text{seawater}}$ ), 3) the fractionation factor ( $\alpha$ ) between  $\text{B}(\text{OH})_3$  and  $\text{B}(\text{OH})_4^-$  and 4) the calculations of acid/base equilibrium constants based temperature, salinity and pressure. To translate our  $\delta^{11}\text{B}$  measurements to pH, we used the following relationship (Hemming and Hanson, 1992):

$$\text{pH} = \text{pK}_B^* - \log \left( \frac{\delta^{11}\text{B}_{\text{seawater}} - \delta^{11}\text{B}_{\text{borate}}}{\delta^{11}\text{B}_{\text{seawater}} - \alpha * \delta^{11}\text{B}_{\text{borate}} - \epsilon} \right) \quad \text{eq. S11}$$

$\text{pK}_B^*$  is the dissociation constant between the two boron species (8.5975 at 25 °C and a salinity of 35 psu, Dickson, 1990). A fractionation between  $\text{B}(\text{OH})_3$  and  $\text{B}(\text{OH})_4^-$  ( $\epsilon$ ) of  $27.2 \pm 0.6 \text{ ‰}$  was empirically determined by Klochko et al. (2006) in seawater and confirmed independently using a different method by Nir et al. (2015).

A few studies have attempted to reconstruct secular variations of  $\delta^{11}\text{B}_{\text{seawater}}$  (Lemarchand et al., 2000; Foster et al., 2012; Raitzsch and Hönisch, 2013; Greenop et al.,

2017). For our work, we first compared different scenarios (Fig. 3). These scenarios are modeled values of  $\delta^{11}\text{B}_{\text{seawater}}$  based on constraints on the boron budget from Lemarchand et al. (2000), a second modeled history that assumed changes in seawater pH from Raitzsch and Hönisch (2013), and a third scenario that also considered constraints on pH gradients from  $\delta^{13}\text{C}$  measurements published by Greenop et al. (2017).

## S2.6. pCO<sub>2</sub> calculations

The carbonate system has two degrees of freedom, meaning that if two parameters of the carbonate system are known all the others can be calculated. For this study, we utilized pH calculated using  $\delta^{11}\text{B}_{\text{borate}}$ , and total alkalinity (TA) as a second parameter that are shown in Fig. 3-4. We used three different alkalinity scenarios for our calculations (Tyrell and Zeebe, 2004; Ridgwell and Zeebe, 2005; and Caves et al. 2016). For all calculations, we used the MS excel program “CO<sub>2</sub>sys” version 2.3 from Pierrot et al. (2006). pH and TA, temperature, salinity were used to determined pCO<sub>2</sub> in  $\mu\text{atm}$ .

## S2.7. Error propagation for temperature (T), pH and pCO<sub>2</sub>

The main source of uncertainty in reconstructed pCO<sub>2</sub> comes from the errors in pH. Table S3 summarizes the sensitivity of pH and pCO<sub>2</sub> to different variables. The individual uncertainties were propagated in quadrature to combined uncertainties for temperature ( $\delta T$ ), pH ( $\delta \text{pH}$ ) and pCO<sub>2</sub> ( $\delta \text{pCO}_2$ ) (eq. S12, S13, S14, S15, S16 and S17). Minimum and maximum propagated uncertainties were derived separately for pH and pCO<sub>2</sub>.  $\delta \text{pCO}_2$  (A) is the full uncertainty propagation,  $\delta \text{pCO}_2$  (B) is the uncertainty propagation without taking into account the  $\delta^{11}\text{B}_{\text{sw}}$ . Both are shown in the figures and discussed below.

$$\delta T_{G. \text{ruber}} = \sqrt{(\delta T_{\text{Mg/Ca}})^2 + (\delta T_{\text{Salinity}})^2 + (\delta T_{\text{pH}})^2} \quad \text{eq. S12}$$

$$\delta T_{T. \text{sacculifer}} = \sqrt{(\delta T_{\text{Mg/Ca}})^2 + (\delta T_{\text{Salinity}})^2} \quad \text{eq. S13}$$

$$\delta \text{pH (A)} = \sqrt{(\delta \text{pH}_{\text{Temperature}})^2 + (\delta \text{pH}_{\text{Salinity}})^2 + (\delta \text{pH}_{\delta^{11}\text{B}_{\text{sw}}})^2 + (\delta \text{pH}_{\delta^{11}\text{B}_{\text{carbonate}}})^2}$$

eq. S14

$$\delta p\text{H (B)} = \sqrt{(\delta p\text{H\_Temperature})^2 + (\delta p\text{H\_Salinity})^2 + (\delta p\text{H\_}\delta^{11}\text{B}_{\text{carbonate}})^2} \quad \text{eq. S15}$$

212

$$\delta p\text{CO}_2 \text{ (A)} = \sqrt{\frac{(\delta p\text{CO}_2\_\text{Temperature})^2 + (\delta p\text{CO}_2\_\text{Salinity})^2 + (\delta p\text{CO}_2\_\delta^{11}\text{B}_{\text{sw}})^2 + (\delta p\text{CO}_2\_\delta^{11}\text{B}_{\text{carbonate}})^2 + (\delta p\text{CO}_2\_\text{Alkalinity})^2}{}} \quad \text{eq. S16}$$

$$\delta p\text{CO}_2 \text{ (B)} = \sqrt{\frac{(\delta p\text{CO}_2\_\text{Temperature})^2 + (\delta p\text{CO}_2\_\text{Salinity})^2 + (\delta p\text{CO}_2\_\delta^{11}\text{B}_{\text{carbonate}})^2 + (\delta p\text{CO}_2\_\text{Alkalinity})^2}{}} \quad \text{eq. S17}$$

215

216 With for example, “ $\delta p\text{CO}_2\_\text{Temperature}$ ” being the uncertainty in  $p\text{CO}_2$  due to temperature.

217

218

219

220



221   **Tables**

222

223   **Table S1:** Control points for a 2‰ offset used for *G. ruber*.

224

225   **Table S2:** Comparison of the control points reconstructions between *T. sacculifer* and *G. ruber* for  
226   MIS 30, 37 and 39, using different offsets (see text).

227

228   **Table S3:** Sensitivity tests for reconstructed pH and pCO<sub>2</sub> (G17, Caves-16), all results are given as  
229   the minimum and maximum variation (%) observed in our data.

230

231

232

| Table S1: Control points for a 2‰ offset used for <i>G. ruber</i> |                      |     |     |   |     |      |                  |             |             |               |                   |                 |                     |       |                |           |           |    |    |
|-------------------------------------------------------------------|----------------------|-----|-----|---|-----|------|------------------|-------------|-------------|---------------|-------------------|-----------------|---------------------|-------|----------------|-----------|-----------|----|----|
| Species                                                           | Sample               |     |     |   | med | mbsf | Shell Wt<br>(µg) | Age<br>(Ma) | SST<br>(°C) | error<br>(°C) | Salinity<br>(psu) | TA<br>(µmol/kg) | pH<br>(total scale) | Error | pCO2<br>(µatm) | Error max | Error min |    |    |
| MIS 30                                                            | <i>G. ruber</i>      | 806 | B 3 | 5 | 6   | 8    | 22.06            | 22.06       | 16.1        | 1.046         | 26.4              | 1.8             | 35.3                | 2241  | 8.16           | 0.09      | 249       | 72 | 55 |
|                                                                   | <i>T. sacculifer</i> | 806 | B 3 | 5 | 31  | 33   | 22.31            | 22.31       | 18.2        | 1.048         | 25.9              | 0.9             | 35.6                | 2230  | 8.28           | 0.08      | 164       | 44 | 35 |
| MIS 37                                                            | <i>G. ruber</i>      | 806 | B 4 | 1 | 71  | 73   | 26.21            | 26.21       | 17.0        | 1.240         | 26.6              | 1.9             | 35.1                | 2230  | 8.09           | 0.09      | 308       | 93 | 69 |
|                                                                   | <i>T. sacculifer</i> | 806 | B 4 | 1 | 56  | 58   | 26.06            | 26.06       | 22.2        | 1.233         | 29.8              | 0.9             | 35.6                | 2228  | 8.08           | 0.09      | 295       | 87 | 66 |
| MIS 39                                                            | <i>G. ruber</i>      | 806 | B 4 | 1 | 131 | 133  | 26.81            | 26.81       | 16.1        | 1.267         | 28.0              | 1.9             | 35.5                | 2228  | 8.09           | 0.09      | 308       | 92 | 69 |
|                                                                   | <i>T. sacculifer</i> | 806 | B 4 | 1 | 146 | 148  | 26.96            | 26.96       | 24.0        | 1.274         | 27.8              | 0.9             | 35.6                | 2219  | 8.07           | 0.09      | 306       | 93 | 69 |

**Table S2:** Comparison of the control points reconstructions between *T. sacculifer* and *G. ruber* for MIS 30, 37 and 39, using different offsets (see text).

|                              | 1.8 ‰ offset |        |        | 1.85 ‰ offset |        |        | 2.0 ‰ offset |        |        | 2.1 ‰ offset |        |        |
|------------------------------|--------------|--------|--------|---------------|--------|--------|--------------|--------|--------|--------------|--------|--------|
|                              | MIS 30       | MIS 37 | MIS 39 | MIS 30        | MIS 37 | MIS 39 | MIS 30       | MIS 37 | MIS 39 | MIS 30       | MIS 37 | MIS 39 |
| $\Delta pCO_2$ ( $\mu atm$ ) | 105          | 37     | 26     | 100           | 31     | 20     | 86           | 13     | 2      | 77           | 1      | -10    |
| $\Delta pH$ (tot scale)      | -0.14        | -0.02  | -0.01  | -0.14         | -0.01  | -0.003 | -0.12        | 0.01   | 0.02   | -0.11        | 0.02   | 0.03   |
| $\Delta T$ (°C)              | -0.02        | -3.75  | -0.36  | 0.06          | -3.65  | -0.27  | 0.31         | -3.39  | -0.005 | 0.47         | -3.21  | 0.17   |

**Table S3:** Sensitivity tests for reconstructed pH and pCO<sub>2</sub> (GI7, Caves-16), all results are given as the minimum and maximum variation (%) observed in our data

|                                           | Salinity   | Temperature | $\delta^{11}\text{B}_{\text{carbonate}}$ | $\delta^{11}\text{B}_{\text{seawater}}$ | Alkalinity |
|-------------------------------------------|------------|-------------|------------------------------------------|-----------------------------------------|------------|
| pH ( <i>G. ruber</i> )                    | 0.07%      | 0.2-0.3%    | 0.2-0.5%                                 | 0.8-1.6%                                | x          |
| pH ( <i>T. sacculifer</i> )               | 0.07-0.08% | 0.12-0.13%  | 0.1-0.5%                                 | 0.8-1.4%                                | x          |
| pCO <sub>2</sub> ( <i>G. ruber</i> )      | 0.8-1.5%   | 0.02-1.5%   | 5-11%                                    | 19-25%                                  | 5%         |
| pCO <sub>2</sub> ( <i>T. sacculifer</i> ) | 0.8-1.4%   | 0.02-0.7%   | 3-12%                                    | 19-27%                                  | 5-7%       |
